# Supplementary material for: LncRNA LOC100129620 promotes osteosarcoma progression through regulating CDK6 expression, tumor angiogenesis, and macrophage polarization
Source: publisher site journal article supplement (doi:10.18632/aging.203042), 2021-05-18
Supplement: Supplementary file [file aging-v13i10-203042-supplementary-material-SD1.pdf]

## SUPPLEMENTARY FIGURES

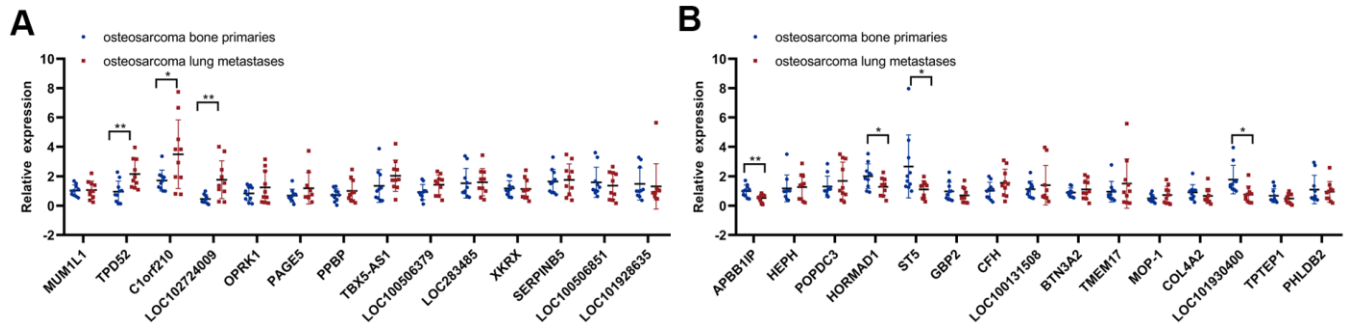

**Supplementary Figure 1. LncRNA and mRNA expression in osteosarcoma bone primary tissues and osteosarcoma lung metastases.** (A) Upregulated lncRNAs and mRNAs in osteosarcoma bone primary tissues and osteosarcoma lung metastases were detected by qRT-PCR and are depicted in a heatmap. Osteosarcoma bone primary tissues,  $n = 10$ ; osteosarcoma lung metastases,  $n = 10$ . (B) Downregulated lncRNAs and mRNAs in osteosarcoma bone primary tissues and osteosarcoma lung metastases were detected by qRT-PCR and are depicted in a heatmap. Osteosarcoma bone primary tissues,  $n = 10$ ; osteosarcoma lung metastases,  $n = 10$ . Statistical analysis was conducted using Student's  $t$ -test. Values are means  $\pm$  SD. \* $P < 0.05$  and \*\* $P < 0.01$ .

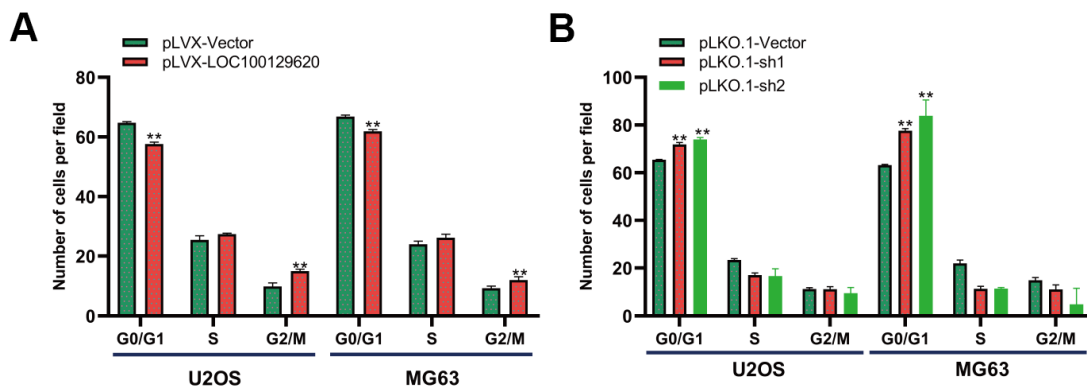

**Supplementary Figure 2. LncRNA LOC100129620 regulates the cell cycle of osteosarcoma cells.** (A) Quantitative flow cytometry analysis of the cell cycle of U2OS and MG63 cells transfected with pLVX-Vector and pLVX-LOC100129620. (B) Quantitative flow cytometry analysis of the cell cycle of U2OS and MG63 cells transfected with pLKO.1-Vector, pLKO.1-sh1, or pLKO.1-sh2. Statistical analysis was conducted using Student's  $t$ -test. Values are means  $\pm$  SD. \*\* $P < 0.01$ .

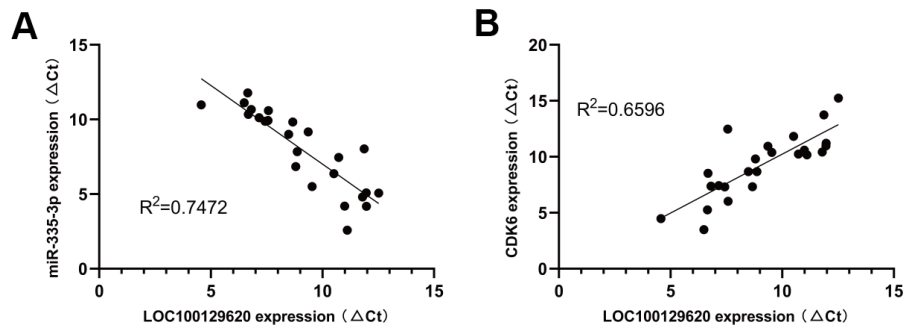

**Supplementary Figure 3.** The correlation between LOC100129620 and miR-335-3p (**A**) or CDK6 (**B**) in osteosarcoma tissue.
